# Supplementary material for: Ribosomal DNA methylation in human and mouse oocytes increases with age
Source: publisher site journal article supplement (doi:10.18632/aging.203891), 2022-02-14
Supplement: Supplementary file [file aging-v14i3-203891-supplementary-material-SD2.pdf]

**SUPPLEMENTARY TABLE**

**Supplementary Table 1. Primers for multiplex (outer) and singleplex (inner) PCR and pyrosequencing of single human and mouse oocytes.**

| <b>Multiplex assay for single human oocytes</b>  |                                            |                                                                       |                   |                        |
|--------------------------------------------------|--------------------------------------------|-----------------------------------------------------------------------|-------------------|------------------------|
| <b>Target region</b>                             | <b>Primer</b>                              | <b>Sequence (5'-3')<sup>a</sup></b>                                   | <b>CpG number</b> | <b>Annealing temp:</b> |
| Human rDNA upstream control element <sup>b</sup> | Forward outer                              | GTGTTTTGGGGTTGATTAGAGG                                                |                   | 60° C                  |
|                                                  | Reverse outer                              | ATCACCRATAAACCAAAACCCC                                                |                   |                        |
|                                                  | Forward inner                              | GTGTTTTGGGGTTGATTAGAGG                                                |                   | 60° C                  |
|                                                  | Reverse inner Sequencing                   | *CATCCCAAAACCCAACCTCTCC<br>GGTTGATTAGAGGGTT                           | 5                 |                        |
| Human rDNA core promoter <sup>c</sup>            | Forward outer                              | GGTAGTTGTYGAGGGAGGGG                                                  |                   | 60° C                  |
|                                                  | Reverse outer                              | AAAAAAACRTCCCAACCTCC                                                  |                   |                        |
|                                                  | Forward inner                              | GTTTTYGTGTGAGTTAGGTAGAGTTT                                            |                   | 60° C                  |
|                                                  | Reverse inner Sequencing                   | *AAAAAAACRTCCCAACCTCC<br>GGTTTATGTGGGGGAGAGGTTGT                      | 9                 |                        |
| Human <i>GTL2</i> (paternally imprinted)         | Forward outer                              | GAATTATAGGAATGATGGTGTA                                                |                   | 60° C                  |
|                                                  | Reverse outer                              | CCAAAATACTAACTACTCCTTAAACA                                            |                   |                        |
|                                                  | Forward inner                              | AGGGTTAGGAAGTTTAGTAGGTTA                                              |                   | 60° C                  |
|                                                  | Reverse inner Sequencing                   | *ACTACTCCTTAAACAAAAAACACATAAT<br>GTAGTAAATTAAGTGTATTAGAGA             | 5                 |                        |
| Human <i>PEG3</i> (maternally imprinted)         | Forward outer                              | GGTTGTTGATTGGTTAGTATAG                                                |                   | 60° C                  |
|                                                  | Reverse outer                              | CACTCACCTCACCTCAATAC                                                  |                   |                        |
|                                                  | Forward inner                              | GGTGTAGAAGTTTGGGTAGTTG                                                |                   | 57° C                  |
|                                                  | Reverse inner Sequencing                   | *CTCACCTCACCTCAATACTAC<br>TGTTTATTTTGGGTTGGT                          | 3                 |                        |
| <b>Multiplex assay for single mouse oocytes</b>  |                                            |                                                                       |                   |                        |
| <b>Target region</b>                             | <b>Primer</b>                              | <b>Sequence (5'-3')<sup>a</sup></b>                                   | <b>CpG number</b> | <b>Annealing temp:</b> |
| Mouse rDNA spacer promoter <sup>d</sup>          | Forward outer                              | GTGTTTAATTGTGTTTGT                                                    |                   | 58° C                  |
|                                                  | Reverse outer                              | CTCCTATATCACCAACCTAAAAACCT                                            |                   |                        |
|                                                  | Forward inner                              | GGAGAAAGTGGTGGGTGGG                                                   |                   | 60° C                  |
|                                                  | Reverse inner Sequencing 1<br>Sequencing 2 | *CTCCTATATCACCAACCTAAAAACCT<br>AGTGAGTGAATGTGG<br>ATTGGTTTGTATGGTTGA  | 4<br>3            |                        |
| Mouse rDNA core promoter <sup>d</sup>            | Forward outer                              | GGAGGAAAGTGATAGGTTATAGAGAAT                                           |                   | 58° C                  |
|                                                  | Reverse outer                              | TCCAAAAACCTCTCTATCCC                                                  |                   |                        |
|                                                  | Forward inner                              | TTGGGGAGGTGGTTAAAAATGA                                                |                   | 60° C                  |
|                                                  | Reverse inner Sequencing 1<br>Sequencing 2 | *CCTCCAAAAACCTCTCTAT<br>GAGGTGGTTTAAAAATGAT<br>GGATTTTAAAGGAATAATTGGT | 2<br>3            |                        |
| Mouse 18S rDNA                                   | Forward outer                              | TTAATTTTTTAGAGGGATAAGTGG                                              |                   | 58° C                  |
|                                                  | Reverse outer                              | AAAACCTCACTAAACCATC                                                   |                   |                        |

|                |               |                             |   |      |
|----------------|---------------|-----------------------------|---|------|
|                | Forward inner | AGGTTTGTGATGTTTTAGATGT      |   | 60°C |
|                | Reverse inner | *AAAACCTCACTAAACCATC        |   |      |
|                | Sequencing 1  | TTTGTGATGTTTTAGATGTT        | 4 |      |
|                | Sequencing 2  | ATTAAGTTTTTGTGTTTTGTATATA   | 4 |      |
|                | Forward outer | TGGAGTAGAAGGGTAAAAGTT       |   | 58°C |
|                | Reverse outer | CAACCAAACACATACACCAAATATCT  |   |      |
| Mouse 28S rDNA | Forward inner | GGTTTTAAGTAGGAGGTGTTAGAAAAG |   | 60°C |
|                | Reverse inner | *CAACCAAACACATACACCAAATATCT |   |      |
|                | Sequencing 1  | GGATAATTGGTTTGTGG           | 7 |      |
|                | Sequencing 2  | GTTGGATTGTTTATTATTAATAGG    | 3 |      |

<sup>a</sup>Primers indicated by a star are biotinylated at the 5' end.

<sup>b</sup>Primers adopted from: Raval A, Sridhar KJ, Patel S, Turnbull BB, Greenberg PL, Mitchell BS. Reduced rRNA expression and increased rDNA promoter methylation in CD34+ cells of patients with myelodysplastic syndromes. *Blood*. 2012;120:4812-8.

<sup>c</sup>Primers adopted from: Teschler S, Gotthardt J, Dammann G, Dammann RH. Aberrant DNA methylation of rDNA and PRIMA1 in borderline personality disorder. *Int J Mol Sci*. 2016;17:E67.

<sup>d</sup>Primers adopted from: Shiao YH, Leighty RM, Wang C, Ge X, Crawford EB, Spurrier JM, McCann SD, Fields JR, Fornwald L, Riffle L, Driver C, Kasprzak KS, Quiñones OA, et al. Ontogeny-driven rDNA rearrangement, methylation, and transcription, and paternal influence. *PLoS One*. 2012;6:e22266.
